# Supplementary material
Source: PubMed Central journal article supplement (PMC5532539)

# Supplementary Figure 1: Uncropped immunoblot

Extended Data Fig. 4h

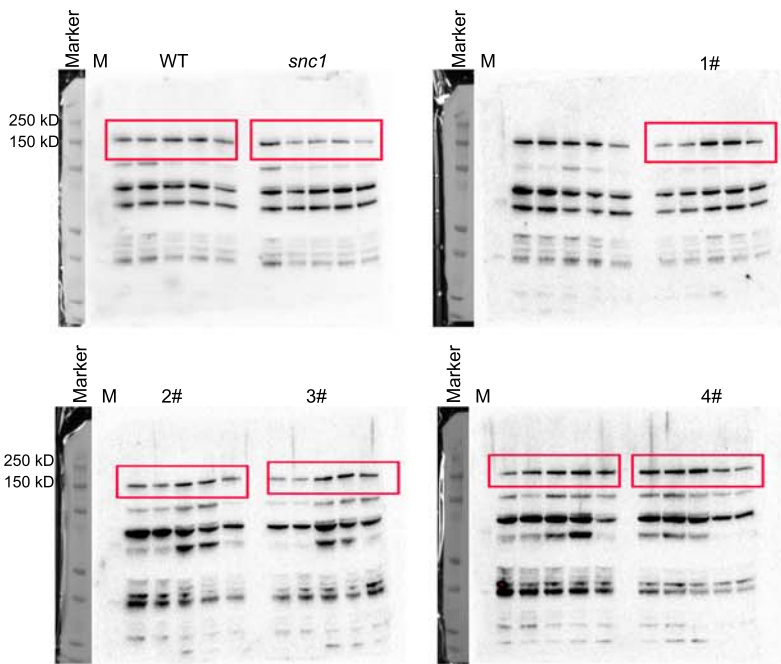

Marker: taken from white light  
M: marker lane on blot

Extended Data Fig. 7e

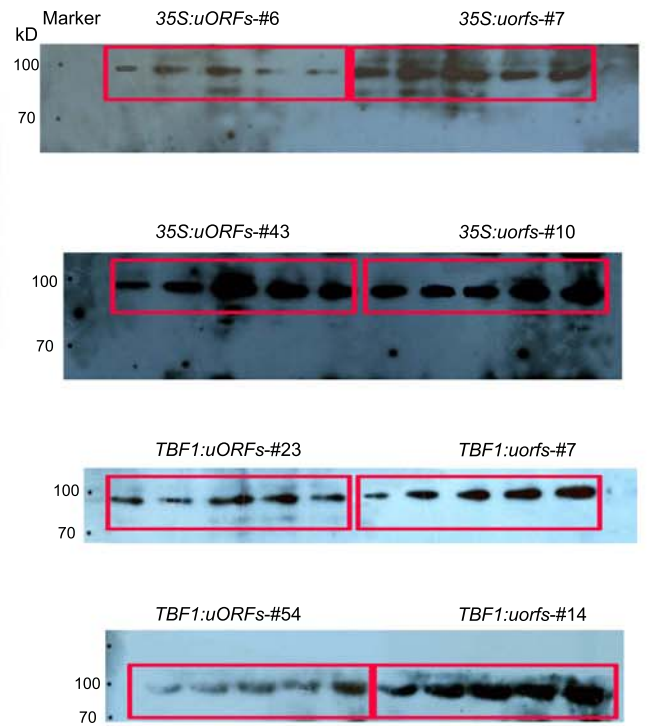

Tester blot for the antibody specificity and the size of the target protein NPR1-EGFP in the Extended Data Fig. 7e

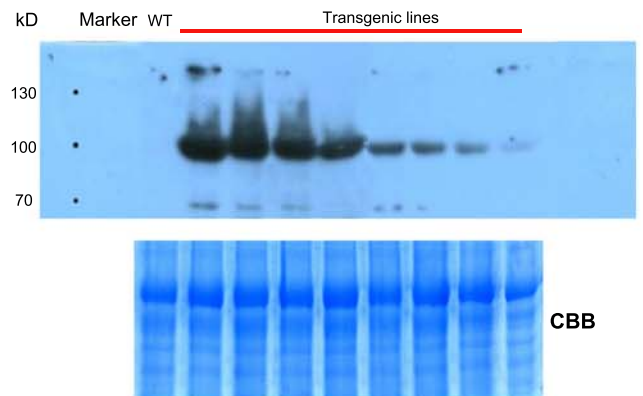

Supplement: NIHMS869899-supplement-supp_fig1.pdf [file NIHMS869899-supplement-supp_fig1.pdf]
